# Supplementary material for: A global meta-analysis of soil organic carbon in the Anthropocene
Source: PubMed Central journal article supplement (PMC10287672; doi:10.1038/s41467-023-39338-z), 2023-06-22
Supplement: 41467_2023_39338_MOESM1_ESM.pdf [file 41467_2023_39338_MOESM1_ESM.pdf]

1 Supplementary Materials to **A Global Meta-analysis of Soil Organic Carbon in the**  
2 **Anthropocene**  
3 Damien Beillouin<sup>1,2\*</sup>, Marc Corbeels<sup>3,4</sup>, Julien Demenois<sup>3,5,6</sup>, David Berre<sup>3,7,8</sup>, Annie Boyer<sup>9</sup>,  
4 Abigail Fallot<sup>10,11</sup>, Frédéric Feder<sup>12,13</sup>, Rémi Cardinael<sup>3,14,15</sup>  
5

- 6 1. CIRAD, UPR HortSys, F-34398 Montpellier, France
- 7 2. HortSys, Univ Montpellier, CIRAD, Montpellier, France
- 8 3. AIDA, Univ Montpellier, CIRAD, Montpellier, France
- 9 4. IITA, Nairobi, Kenya
- 10 5. CIRAD, UPR AIDA, Turrialba 30501, Costa Rica
- 11 6. CATIE, Centro Agronómico Tropical de Investigación y Enseñanza, Turrialba 30501,  
12 Costa Rica
- 13 7. CIRAD, UPR AIDA, Bobo-Dioulasso, Burkina Faso
- 14 8. CIRDES, USPAAE, Bobo-Dioulasso, Burkina Faso
- 15 9. CIRAD, DGDRS, DIST, F-34398 Montpellier, France
- 16 10. CIRAD, UMR SENS, Montpellier, France
- 17 11. SENS, Univ Montpellier, CIRAD, Montpellier, France
- 18 12. CIRAD, UPR Recyclage et Risque, Montpellier, France
- 19 13. Recyclage et Risque, Univ Montpellier, CIRAD, Montpellier, France
- 20 14. CIRAD, UPR AIDA, Harare, Zimbabwe
- 21 15. Department of Plant Production Sciences and Technologies, University of Zimbabwe,  
22 Harare, Zimbabwe

23 \* corresponding author

24 \* *damien.beillouin@cirad.fr*

25  
26  
27  
28  
29  
30  
31

32 **Supplementary Figure 1.** Categorization of available meta-analyses according to the metric  
33 used to calculate the effect-size, the role of the SOC variable and the type of carbon analysed.  
34 The total number of meta-analyses with main effect on SOC is 230 (202+33 – 5 meta-  
35 analyses presenting both effect-sizes as ratio and other effect sizes).  
36  
37

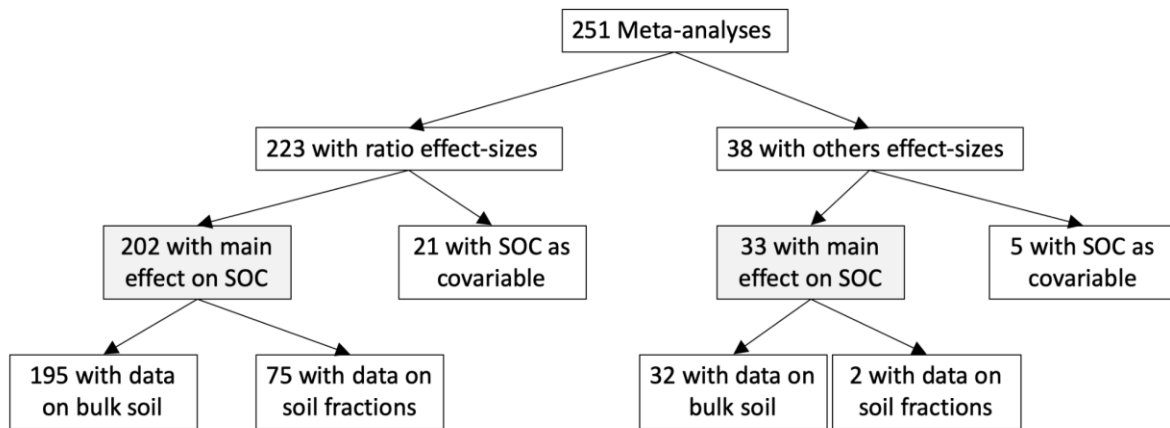

38  
39  
40  
41  
42  
43  
44

The list and characteristics of the meta-analyses is available here:

[https://rpubs.com/dbeillouin/List\\_studies](https://rpubs.com/dbeillouin/List_studies)

45 **Supplementary Figure 2.** Comparisons of the results between frequentist and Bayesian  
46 inference for land-use change (a.), Management (b) and Climate change (c) factors. Best  
47 frequentist and Bayesian models were selected based on their AIC and WAIC, respectively.  
48 Each point represents a mean calculated effect-size. Colors indicate the difference between  
49 the two models.  
50

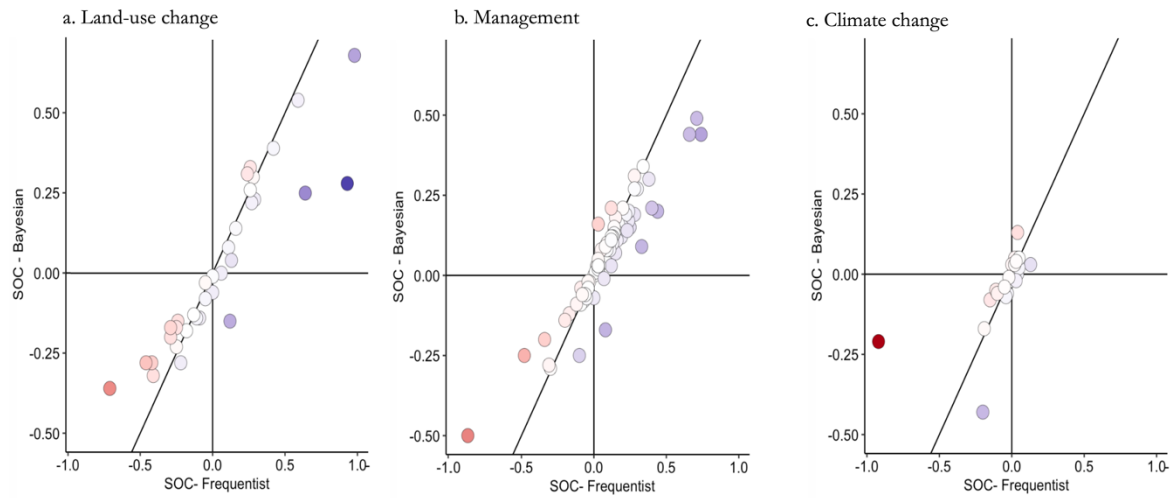

51  
52  
53  
54  
55  
56  
57  
58  
59  
60

61 **Supplementary Figure 3.** Comparisons of the results between the best frequentist mixed  
62 model (selected based on their AIC) and fixed effect model for land-use change (a.),  
63 Management (b) and Climate change (c) factors. Each point represents a mean calculated  
64 effect-size. Colors indicate the difference between the two models. Details of the information  
65 used to make this graph are available at : [https://rpubs.com/dbeillouin/Suppl\\_soil\\_depth](https://rpubs.com/dbeillouin/Suppl_soil_depth)  
66  
67

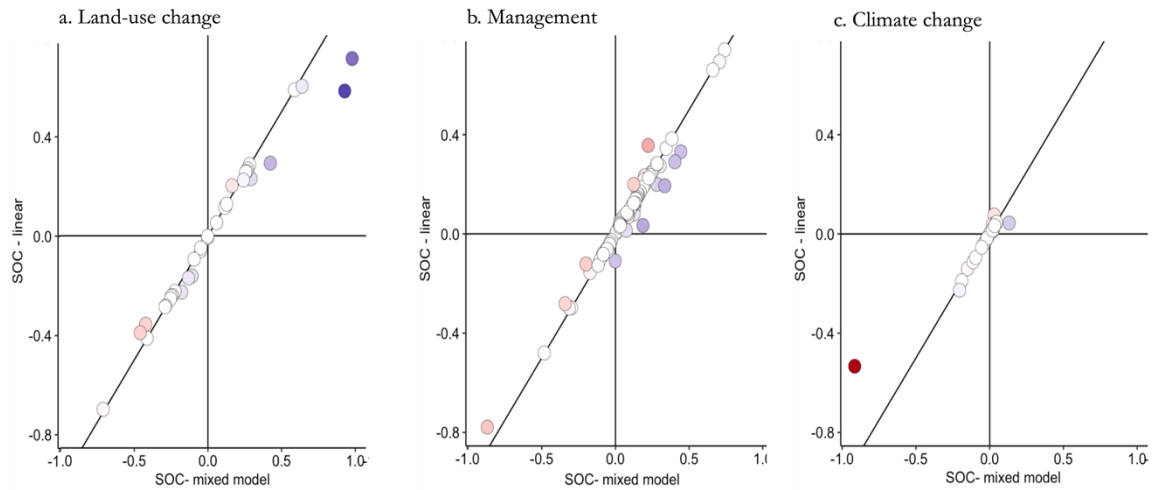

68  
69  
70  
71  
72  
73  
74  
75  
76  
77  
78  
79  
80  
81  
82  
83  
84  
85  
86  
87  
88  
89  
90  
91  
92  
93  
94  
95  
96  
97

98  
99  
100  
101  
102  
103

**Supplementary Figure 4.** Funnel plot: Mean effect size vs. their precision for the whole database. Each point represents an effect-size. The bubble size is proportional to the number of Data. Color represent the various land-use type.

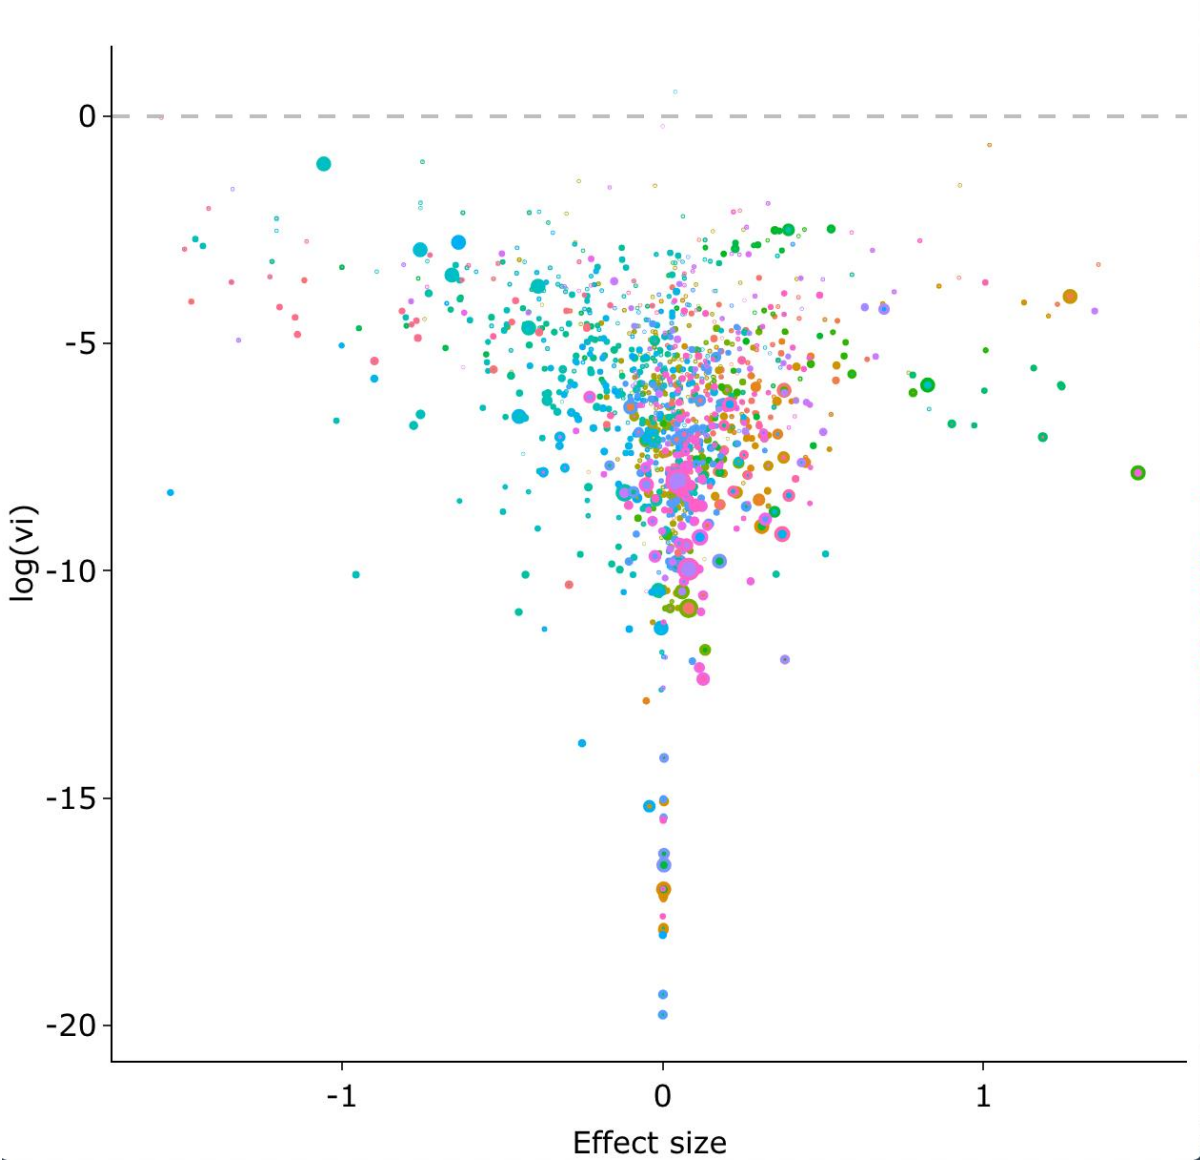

104  
105  
  
106  
107  
108  
109  
110  
111  
112  
113  
114

115

116 **Supplementary Figure 5.** Comparison between linear and trim and fill method impact on the  
117 mean estimates.

118

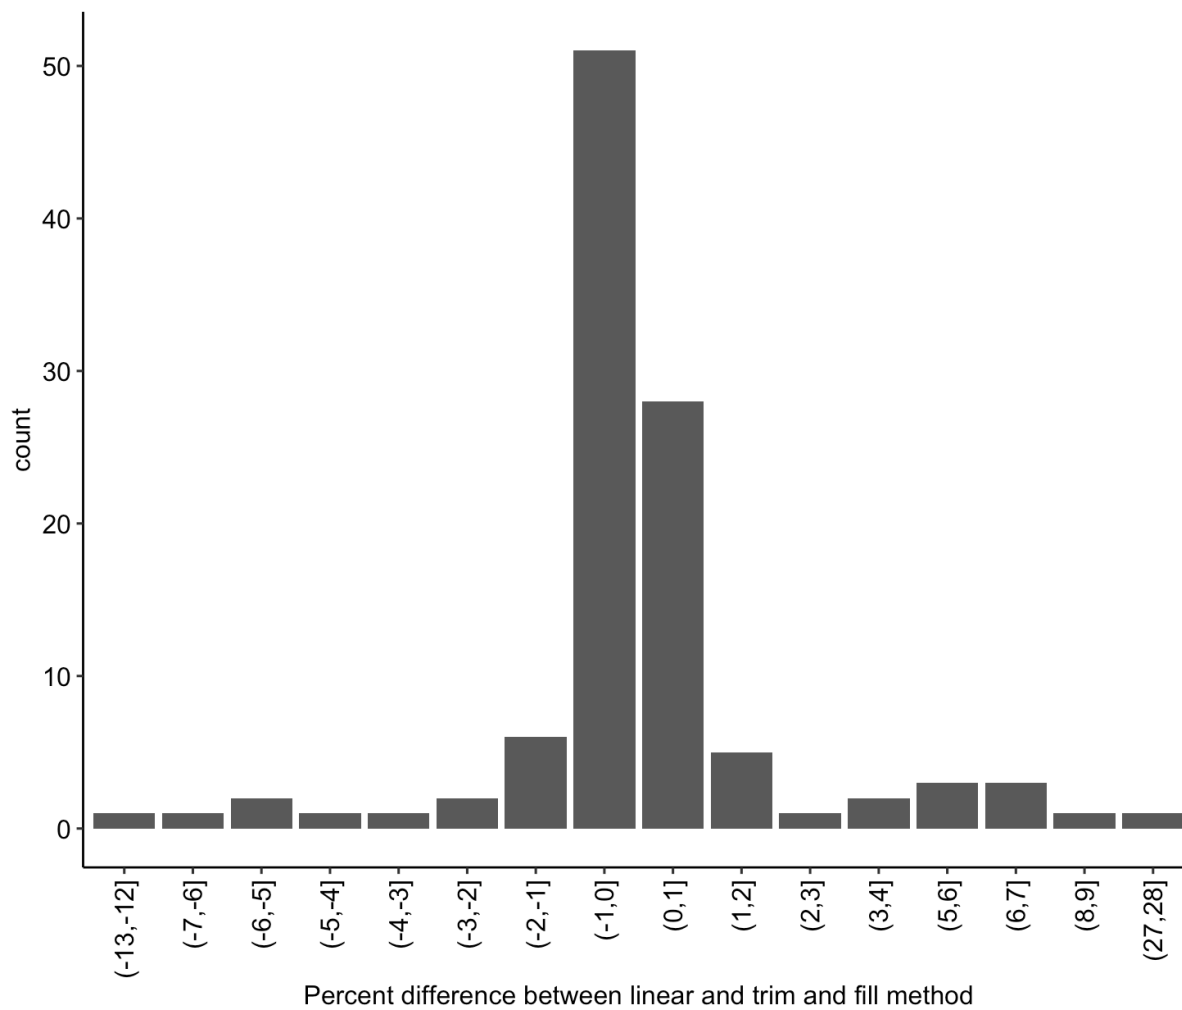

119

120

121

122

123

124

125

126 **Supplementary Figure 6.** Comparison of results (when available) between SOC Stock and  
127 SOC concentration for land-use change (a.), Management (b) and Climate change (c) factors..  
128 Only few comparisons were available to compare results between SOC stock and SOC  
129 concentration.

130  
131

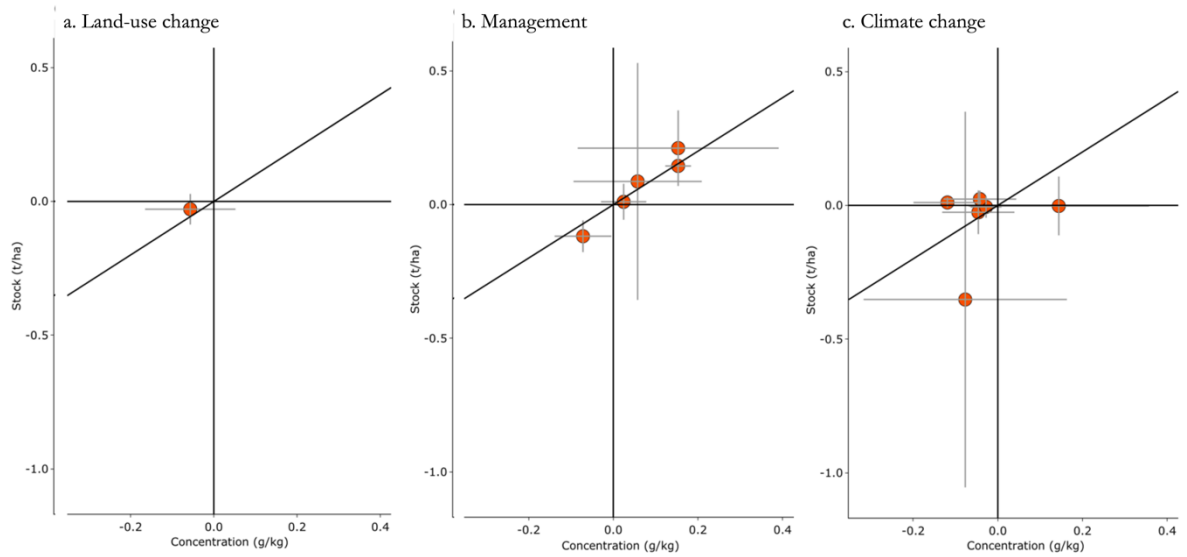

132
