# Supplementary material for: A global meta-analysis of soil organic carbon in the Anthropocene
Source: PubMed Central journal article supplement (PMC10287672; doi:10.1038/s41467-023-39338-z), 2023-06-22
Supplement: 41467_2023_39338_MOESM3_ESM.pdf [file 41467_2023_39338_MOESM3_ESM.pdf]

## Description of Additional Supplementary Files:

**Supplementary Dataset 1.** Percentage change in soil organic carbon (SOC) resulting from land-use change, land management, and climate change, according to soil depth. An interactive version of the plot is available at [https://rpubs.com/dbeillouin/Supl\\_soil\\_depth](https://rpubs.com/dbeillouin/Supl_soil_depth)

**Supplementary Dataset 2.** Percentage change in soil organic carbon (SOC) resulting from land-use change, land management, and climate change detailed according to the type of metric used to quantify soil Carbon. Warning; these results are obtained with a nonsystematic review of the literature. An interactive version of the plot is available at: [https://rpubs.com/dbeillouin/Suppl\\_All\\_effects](https://rpubs.com/dbeillouin/Suppl_All_effects)

**Supplementary Dataset 3.** Percentage change in soil organic carbon (SOC) resulting from a combination of intervention related to land-use change, land management, and climate Damien Beillouin Agronomy CIRAD, Hortys Lab [damien.beillouin@cirad.fr](mailto:damien.beillouin@cirad.fr) change. An interactive version of the plot is available at: [https://rpubs.com/dbeillouin/Combi\\_practices](https://rpubs.com/dbeillouin/Combi_practices)
